# Supplementary material
Source: Springer Nature journal article supplement (https://www.springermedizin.de/resource/supplementary/13058_2014_3372_MOESM1_ESM.pdf/9704004)

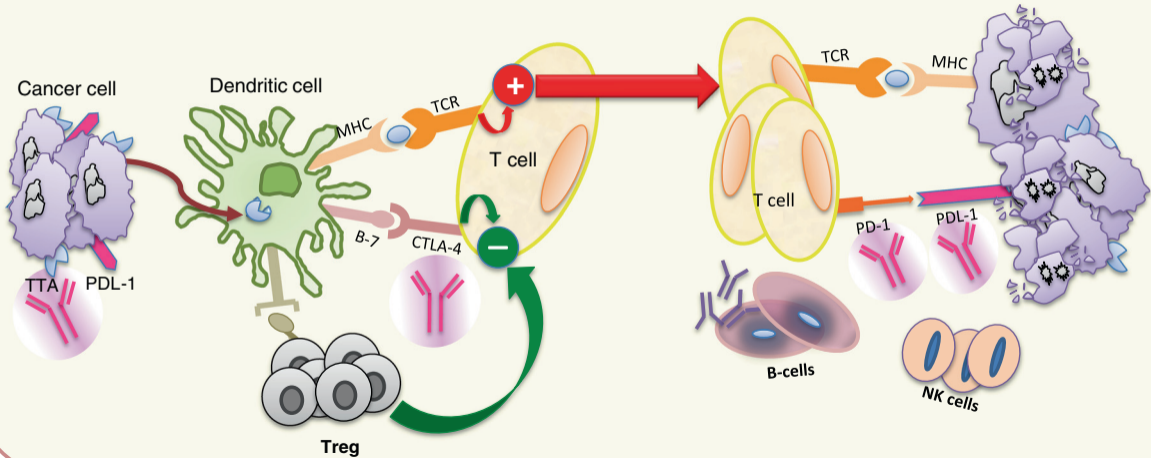

Supplement: MOESM1 [file 9704004]
